# Supplementary material
Source: ML conference proceedings conference paper supplement (https://openreview.net/forum?id=wfZGut6e09)
Supplement: supplementary_material [file attachment]

Multi-Objective GridWorld Episode Reward

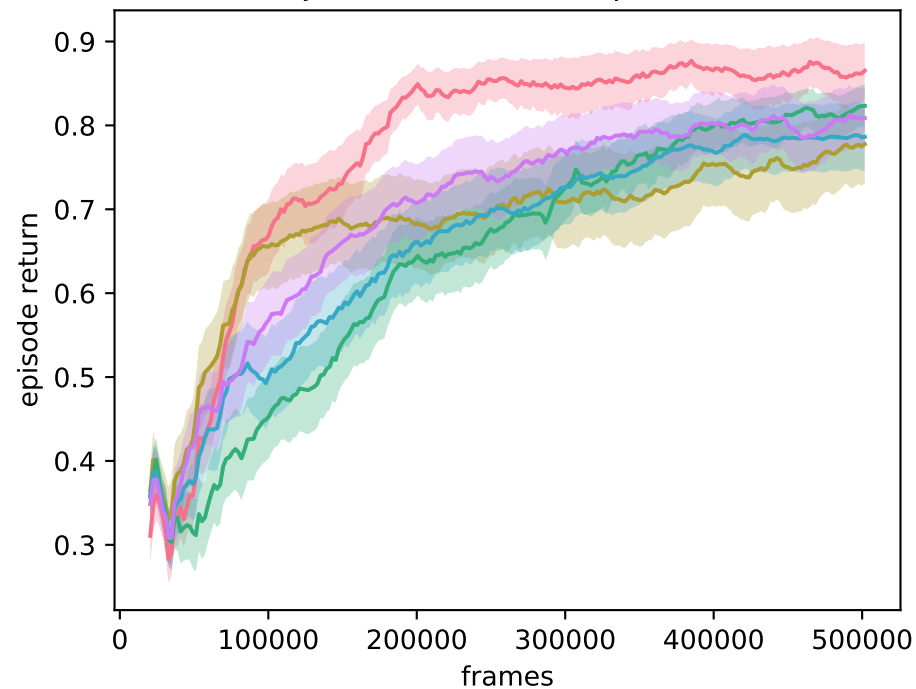

Multi-Objective GridWorld Episode Time Penalty

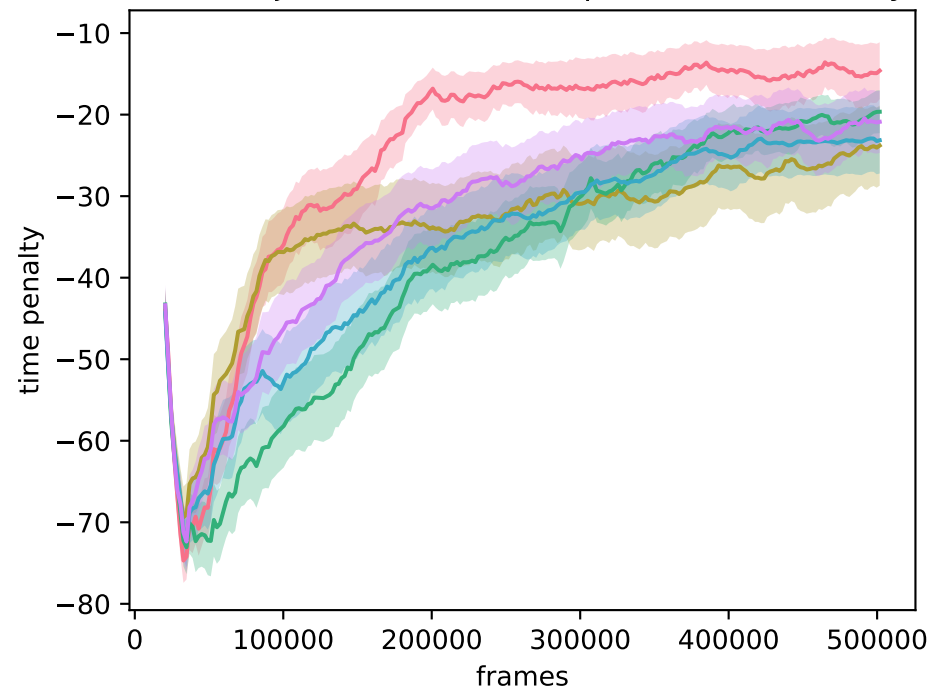

Deep Sea Treasure Episode Reward

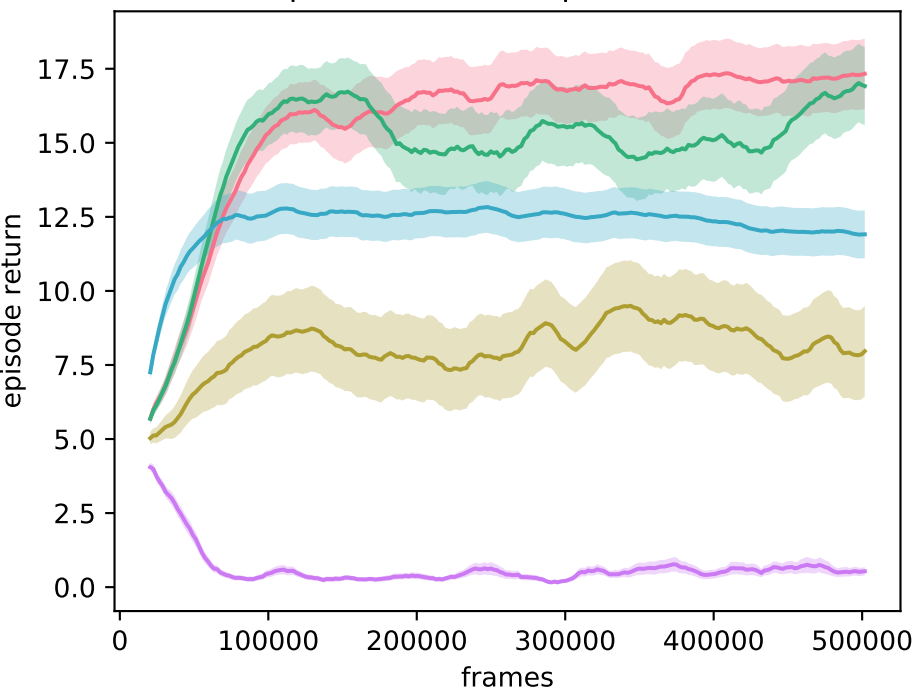

Deep Sea Treasure Episode Time Penalty

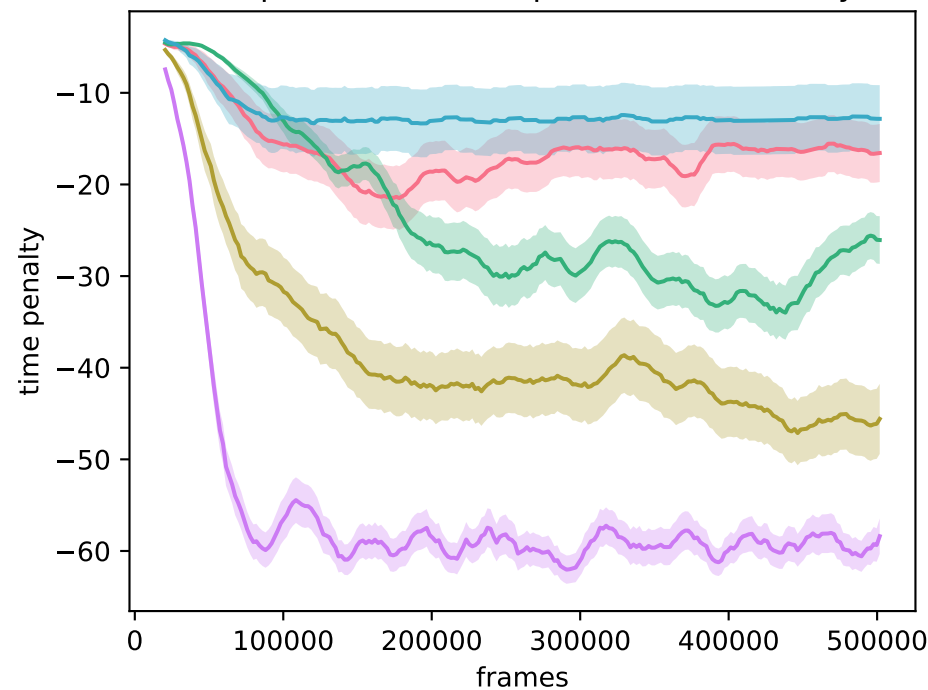

— PPA — na-PPA —  $\omega_1 = 0.5$  —  $\omega_1 = 0.75$  —  $\omega_1 = 0.25$
