# Supplementary material
Source: ML conference proceedings conference paper supplement (https://openreview.net/forum?id=wfZGut6e09)

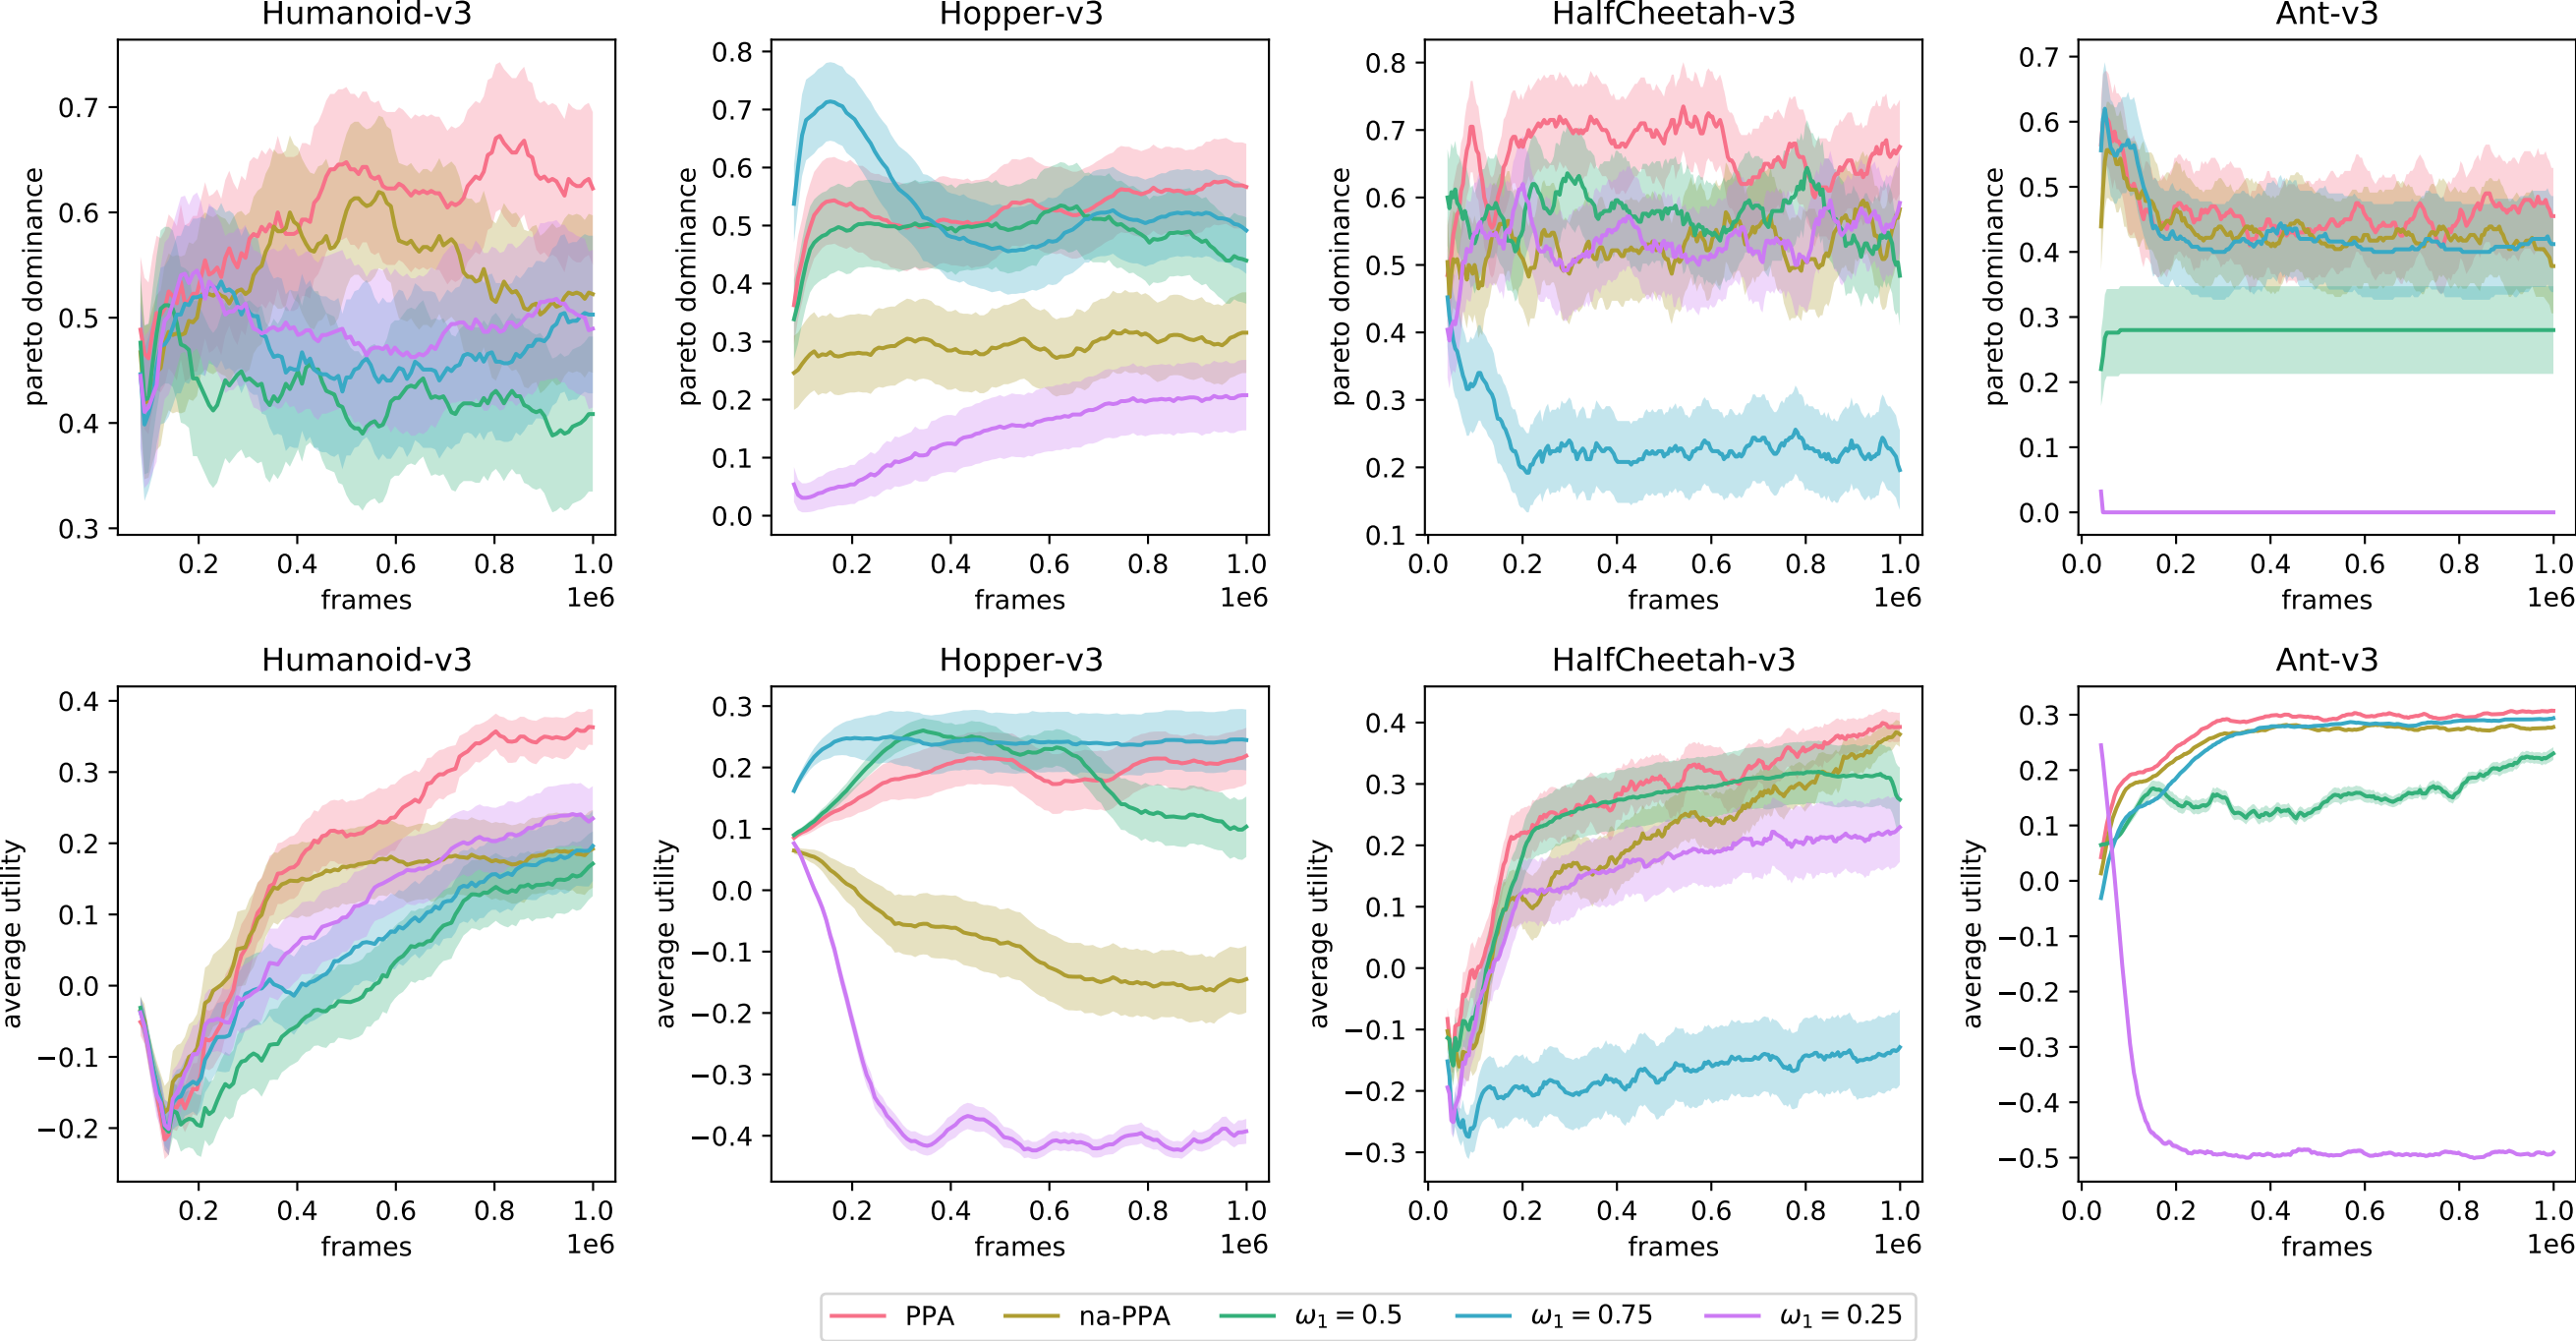

Supplement: supplementary_material [file attachment]

## DST Enviroment Reward Map

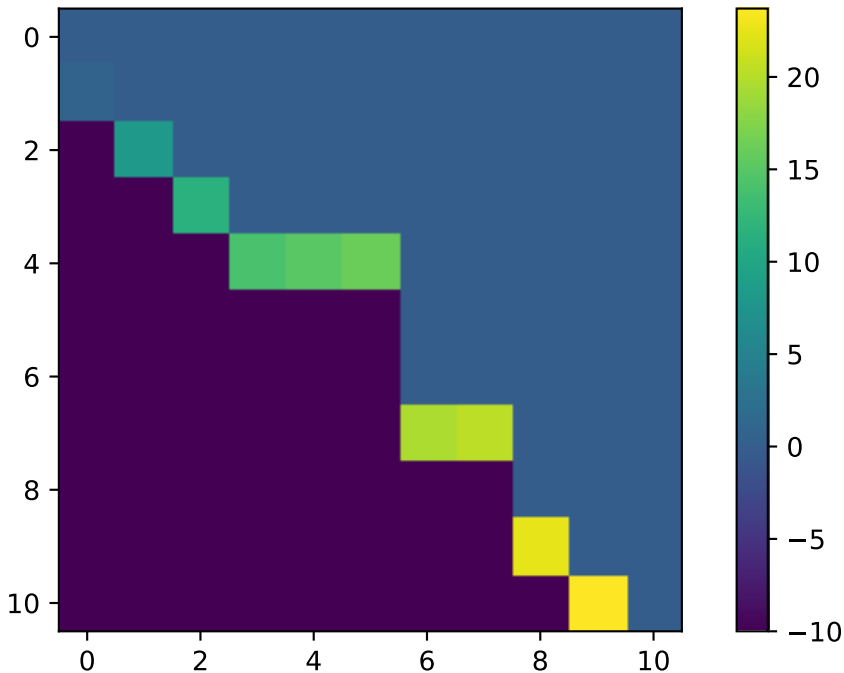

Supplement: supplementary_material [file attachment]

# MOGW Enviroment

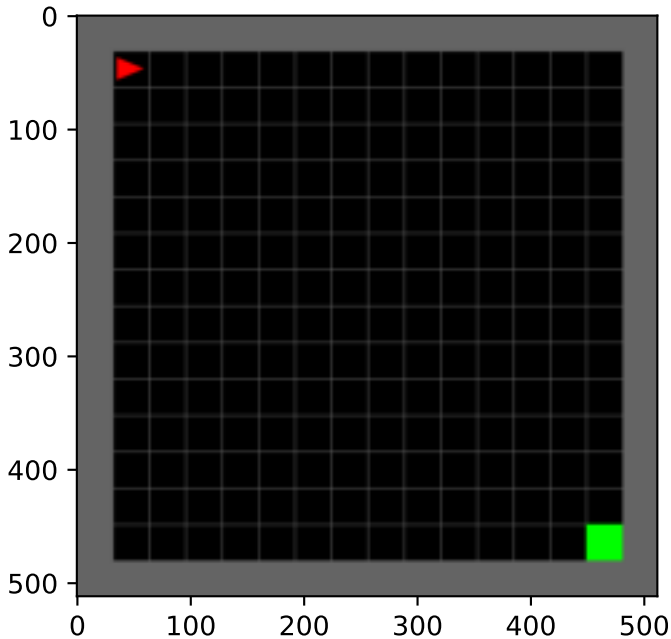

Supplement: supplementary_material [file attachment]
